# Supplementary material
Source: PubMed Central journal article supplement (PMC4303315)
Supplement: bi501188a_si_001.pdf [file bi501188a_si_001.pdf]

## Supplementary Table S1

Raw peptide digest mass spectroscopy data spanning a centroid mass window ranging from 698 to 2551. All peaks with a signal:noise ratio  $\geq 20$  are included and sorted in descending order of signal:noise ratio. Peptides that represent  $\alpha$ Syn fragments are labeled.

| Centroid Mass | Lower Bound | Upper Bound | Height | S/N Ratio | Area      | Peptide                                        |
|---------------|-------------|-------------|--------|-----------|-----------|------------------------------------------------|
| 2152.47168    | 2151.56     | 2153.1      | 17632  | 7589      | 172022.36 | K.TKEQVTNVGGAVVTGVTAVAQK.T                     |
| 1475.54956    | 1474.99     | 1476.26     | 27363  | 2761      | 222522.95 | K.TVEGAGSIAAXTGFKV.K                           |
| 1603.36572    | 1602.88     | 1604.08     | 13968  | 1868      | 113905.4  | K.TVEGAGSIAAXTGFKV.D                           |
| 842.51001     | 842.03      | 842.92      | 43994  | 1745      | 306816.53 | <i>R.VATVSLPR.S autocatalysis of trypsin</i>   |
| 1521.51367    | 1521.16     | 1522.09     | 11994  | 1336      | 93803.47  | K.TKEGVVHGVATVAEK.T                            |
| 1178.07813    | 1177.35     | 1178.57     | 16580  | 1079      | 125467.45 | K.TKEGVLYVGSK.T                                |
| 1923.82312    | 1923.27     | 1924.43     | 3683   | 1016      | 32158.61  | K.EQVTNVGGAVVTGVTAVAQK.T                       |
| 2190.36816    | 2190.01     | 2190.87     | 1286   | 637       | 11770.84  |                                                |
| 1292.87134    | 1292.31     | 1293.55     | 7732   | 630       | 60242.06  | K.EGVVHGVATVAEK.T                              |
| 840.67639     | 840.48      | 841.07      | 16956  | 614       | 100705.4  |                                                |
| 2174.42578    | 2173.9      | 2174.96     | 907    | 422       | 7882.5    |                                                |
| 949.43634     | 949.25      | 949.91      | 9697   | 414       | 63217.34  | K.EGVLYVGSK.T                                  |
| 2178.4231     | 2178.03     | 2178.94     | 814    | 351       | 6864.81   |                                                |
| 858.474       | 858.22      | 858.89      | 6823   | 275       | 45629.51  |                                                |
| 1513.44153    | 1513.16     | 1513.95     | 2169   | 242       | 16183.37  |                                                |
| 1318.82849    | 1318.37     | 1319.29     | 2627   | 223       | 20695.55  |                                                |
| 1070.25989    | 1070.05     | 1070.68     | 4288   | 223       | 28800.85  | K.AKEGVVAAAEK.T                                |
| 2194.38135    | 2193.95     | 2194.93     | 484    | 177       | 4319      |                                                |
| 975.39667     | 975.22      | 975.88      | 3441   | 154       | 22471.35  |                                                |
| 1497.50293    | 1497.27     | 1497.93     | 1323   | 146       | 9696.56   |                                                |
| 1961.72693    | 1961.43     | 1962.11     | 413    | 142       | 3091.08   |                                                |
| 1547.47412    | 1547.05     | 1547.94     | 1042   | 122       | 8422.04   |                                                |
| 1043.29224    | 1043.11     | 1043.71     | 2259   | 116       | 14429.85  | <i>K.LSSPATLNSR.V autocatalysis of trypsin</i> |
| 1641.25635    | 1640.91     | 1641.81     | 746    | 112       | 6183.45   |                                                |
| 2134.54028    | 2133.86     | 2134.96     | 219    | 107       | 3423.7    |                                                |
| 1204.03931    | 1203.8      | 1204.42     | 1448   | 107       | 10513.74  |                                                |
| 880.39276     | 880.15      | 880.79      | 2636   | 105       | 20801.92  |                                                |
| 1215.96924    | 1215.76     | 1216.45     | 1269   | 102       | 9221.45   |                                                |
| 1559.4071     | 1558.9      | 1559.89     | 795    | 101       | 6661.4    |                                                |
| 1501.50916    | 1501.01     | 1501.89     | 956    | 100       | 7539.54   | K.TVEGAGSIAAXTGFKV.K                           |
| 869.46356     | 869.23      | 869.61      | 1986   | 81        | 13699.23  |                                                |
| 2206.25757    | 2205.95     | 2206.93     | 176    | 78        | 1800.28   |                                                |
| 1945.77539    | 1945.37     | 1946.35     | 248    | 75        | 2262.27   |                                                |
| 1625.32007    | 1624.81     | 1625.83     | 500    | 70        | 4566.34   |                                                |

**Supplementary Table S1**

|            |         |         |      |    |          |                                                    |
|------------|---------|---------|------|----|----------|----------------------------------------------------|
| 1200.02698 | 1199.8  | 1200.48 | 909  | 70 | 6224.12  |                                                    |
| 1161.06018 | 1160.47 | 1161.54 | 1070 | 70 | 11293.31 |                                                    |
| 896.32343  | 895.97  | 896.81  | 1697 | 68 | 15195.81 |                                                    |
| 828.62994  | 828.47  | 828.99  | 1891 | 65 | 15790.78 | K.QGVAEAAGK.T                                      |
| 2108.57129 | 2107.72 | 2109.1  | 184  | 63 | 2954.49  |                                                    |
| 971.38177  | 971.21  | 971.83  | 1395 | 63 | 10392.53 |                                                    |
| 778.66058  | 778.56  | 778.92  | 1687 | 62 | 10211.17 |                                                    |
| 1330.76465 | 1330.52 | 1331.22 | 690  | 61 | 4962     |                                                    |
| 864.45026  | 864.21  | 864.84  | 1578 | 60 | 14629.84 |                                                    |
| 1517.46118 | 1517.2  | 1517.82 | 576  | 59 | 4500.05  |                                                    |
| 1314.81348 | 1314.49 | 1315.11 | 677  | 59 | 4888.77  |                                                    |
| 1543.46472 | 1543.18 | 1543.9  | 502  | 58 | 3899.83  |                                                    |
| 704.6626   | 704.5   | 705.18  | 1749 | 57 | 18281.48 |                                                    |
| 1629.32129 | 1629.03 | 1629.58 | 402  | 56 | 3302.89  | K.TVEGAGSIAAXTG FVKK.D                             |
| 1965.73181 | 1965.22 | 1966.01 | 205  | 54 | 1709.25  |                                                    |
| 1949.77173 | 1949.49 | 1950.15 | 190  | 52 | 1733.28  |                                                    |
| 1229.54968 | 1229.24 | 1230.06 | 346  | 52 | 1642.18  | -.MDVFMKGLSK.A N-Acetyl (Protein); 2 Oxidation (M) |
| 1563.42688 | 1563.1  | 1563.85 | 474  | 51 | 3692.62  |                                                    |
| 2212.30835 | 2211.91 | 2212.66 | 101  | 50 | 1125.78  |                                                    |
| 871.54382  | 871.02  | 871.89  | 1541 | 50 | 16900.82 |                                                    |
| 866.63361  | 866.54  | 866.98  | 1231 | 49 | 8929.18  |                                                    |
| 1057.271   | 1057.1  | 1057.68 | 949  | 48 | 6541.08  |                                                    |
| 850.55505  | 850.44  | 850.92  | 1315 | 48 | 10580.59 |                                                    |
| 826.55048  | 826.09  | 826.95  | 1274 | 48 | 13756.99 |                                                    |
| 723.62408  | 723.29  | 724.15  | 1512 | 47 | 15449.96 |                                                    |
| 2162.4834  | 2161.96 | 2163.04 | 108  | 46 | 1396.64  |                                                    |
| 1530.45837 | 1530.09 | 1530.91 | 594  | 44 | 5202.64  |                                                    |
| 705.65259  | 705.34  | 706.11  | 1536 | 44 | 16610.01 |                                                    |
| 1645.28235 | 1644.95 | 1645.7  | 332  | 42 | 2681.81  | K.TVEGAGSIAAXTG FVKK.D                             |
| 811.63654  | 811.54  | 811.97  | 1093 | 42 | 8989.73  |                                                    |
| 1334.79163 | 1334.45 | 1335.17 | 537  | 40 | 4381.3   |                                                    |
| 987.32233  | 987.18  | 987.61  | 905  | 40 | 6312.34  |                                                    |
| 1535.43799 | 1535.03 | 1535.89 | 364  | 39 | 4239.43  |                                                    |
| 703.65759  | 703.52  | 704.15  | 1288 | 39 | 14599.14 |                                                    |
| 700.66791  | 700.34  | 701.22  | 1117 | 39 | 14667.8  |                                                    |
| 2216.32495 | 2215.87 | 2216.74 | 115  | 38 | 1193.55  |                                                    |
| 1219.99988 | 1219.75 | 1220.29 | 623  | 38 | 4675     |                                                    |
| 860.46637  | 860     | 860.85  | 1438 | 37 | 14596.82 |                                                    |

**Supplementary Table S1**

|            |         |         |      |    |          |
|------------|---------|---------|------|----|----------|
| 2510.88354 | 2510.53 | 2511.27 | 55   | 36 | 501.11   |
| 702.66254  | 702.54  | 703.11  | 1146 | 36 | 14890.03 |
| 701.65527  | 701.22  | 702.16  | 1247 | 36 | 14299.56 |
| 1177.03711 | 1176.42 | 1177.35 | 498  | 35 | 5464.37  |
| 1108.15088 | 1107.93 | 1108.53 | 658  | 35 | 5003.68  |
| 722.62927  | 722.28  | 723.16  | 1092 | 35 | 13733    |
| 1905.86755 | 1905.57 | 1906.38 | 121  | 34 | 1132.61  |
| 741.58356  | 741.14  | 742.03  | 1017 | 34 | 11228.89 |
| 707.64197  | 707.22  | 708.17  | 1087 | 34 | 12372.07 |
| 2151.47583 | 2151.22 | 2151.56 | 67   | 33 | 848.98   |
| 1526.48425 | 1526.15 | 1526.84 | 385  | 33 | 3418.33  |
| 1274.90332 | 1274.4  | 1275.35 | 433  | 33 | 4971.82  |
| 724.62872  | 724.28  | 725.19  | 1089 | 33 | 15259.19 |
| 717.62622  | 717.27  | 718.16  | 1001 | 33 | 12974.34 |
| 1665.2688  | 1664.84 | 1665.57 | 195  | 32 | 1765.07  |
| 1529.37402 | 1528.96 | 1529.8  | 265  | 32 | 2931.78  |
| 1457.60352 | 1456.98 | 1458.17 | 387  | 32 | 5184.41  |
| 730.59637  | 730.17  | 731.1   | 1039 | 32 | 11824.69 |
| 727.62122  | 727.18  | 728.18  | 1032 | 32 | 12325.38 |
| 1585.37878 | 1585.05 | 1585.94 | 285  | 31 | 3442.63  |
| 731.58545  | 731.16  | 732.1   | 1010 | 31 | 12582.09 |
| 716.62347  | 716.29  | 716.77  | 995  | 31 | 10099.8  |
| 1503.52026 | 1503.1  | 1504.08 | 537  | 30 | 5235.15  |
| 891.07642  | 890.86  | 891.21  | 969  | 30 | 6781.89  |
| 729.59943  | 729.25  | 730.08  | 920  | 30 | 11371.12 |
| 1472.54346 | 1472.27 | 1472.86 | 300  | 29 | 2349.75  |
| 1431.60962 | 1431.13 | 1432.09 | 332  | 29 | 3825.7   |
| 907.00977  | 906.77  | 907.14  | 963  | 29 | 6076.78  |
| 726.60522  | 726.37  | 727.18  | 937  | 29 | 11867.27 |
| 715.62726  | 715.36  | 715.75  | 927  | 29 | 8964.83  |
| 706.64691  | 706.34  | 707.14  | 1043 | 29 | 12871    |
| 742.58215  | 742.15  | 743.07  | 918  | 28 | 11597.49 |
| 698.64093  | 698.53  | 699.15  | 711  | 28 | 12627.19 |
| 744.57379  | 744.21  | 744.76  | 811  | 27 | 9494.79  |
| 1254.92993 | 1254.61 | 1255.29 | 309  | 26 | 3557.22  |
| 1077.22253 | 1077.06 | 1077.55 | 653  | 26 | 4889.21  |
| 774.4975   | 774.26  | 775.1   | 706  | 26 | 8887.55  |
| 2230.26025 | 2229.93 | 2230.6  | 64   | 25 | 679.9    |

**Supplementary Table S1**

|            |         |         |      |    |          |
|------------|---------|---------|------|----|----------|
| 1240.94885 | 1240.76 | 1241.28 | 308  | 25 | 2832.74  |
| 1096.21167 | 1096.03 | 1096.48 | 616  | 25 | 4366.74  |
| 767.52521  | 767.09  | 768.03  | 766  | 25 | 9817.43  |
| 721.61932  | 721.4   | 722.2   | 778  | 25 | 11121.08 |
| 719.61768  | 719.46  | 720.1   | 789  | 25 | 11385.95 |
| 713.64197  | 713.24  | 714.04  | 763  | 25 | 11274.11 |
| 711.64429  | 711.25  | 712.14  | 815  | 25 | 11007.58 |
| 709.63599  | 709.25  | 710.05  | 787  | 25 | 10959.93 |
| 2215.29639 | 2214.97 | 2215.87 | 80   | 24 | 944.04   |
| 870.46552  | 870.2   | 870.86  | 1008 | 24 | 11935.96 |
| 785.49585  | 785.22  | 785.96  | 765  | 24 | 9470.64  |
| 781.51147  | 781.27  | 782.01  | 614  | 24 | 8661.86  |
| 745.58185  | 745.31  | 746.12  | 766  | 24 | 10821.44 |
| 733.58929  | 733.26  | 734.19  | 759  | 24 | 9902.97  |
| 728.61438  | 728.39  | 729.12  | 866  | 24 | 9937.13  |
| 698.44489  | 698.31  | 698.53  | 776  | 24 | 5275.27  |
| 770.51794  | 770.09  | 771.07  | 781  | 23 | 9368.71  |
| 765.53693  | 765.24  | 766.05  | 657  | 23 | 9867.95  |
| 732.58527  | 732.28  | 733.11  | 839  | 23 | 9930.67  |
| 725.62817  | 725.19  | 726.15  | 840  | 23 | 11853.94 |
| 718.62561  | 718.47  | 719.05  | 844  | 23 | 10161.17 |
| 854.58325  | 854.46  | 854.95  | 731  | 22 | 6395.74  |
| 824.46204  | 823.98  | 824.88  | 547  | 22 | 11023.72 |
| 807.44812  | 807.06  | 808     | 557  | 22 | 8107.39  |
| 789.49316  | 789.27  | 790.1   | 569  | 22 | 7601.67  |
| 769.52325  | 769.09  | 770.09  | 686  | 22 | 9220.96  |
| 760.54266  | 760.28  | 761.09  | 754  | 22 | 9644.53  |
| 756.54626  | 756.1   | 757.08  | 709  | 22 | 8995.44  |
| 753.55377  | 753.31  | 754.07  | 708  | 22 | 8719.67  |
| 751.58374  | 751.3   | 752.08  | 663  | 22 | 9067.92  |
| 739.57532  | 739.18  | 739.99  | 663  | 22 | 9179.46  |
| 710.64111  | 710.27  | 711.07  | 746  | 22 | 10407.34 |
| 699.67761  | 699.51  | 699.82  | 958  | 22 | 9498.55  |
| 2146.49438 | 2146.09 | 2146.8  | 66   | 21 | 904.12   |
| 1581.36267 | 1581.04 | 1581.73 | 248  | 21 | 2197.76  |
| 834.39948  | 834.13  | 834.86  | 557  | 21 | 8309.39  |
| 786.48901  | 786.13  | 787.01  | 741  | 21 | 8903.81  |
| 747.56769  | 747.3   | 748.14  | 676  | 21 | 9309.38  |

**Supplementary Table S1**

|            |         |         |     |    |         |
|------------|---------|---------|-----|----|---------|
| 746.57599  | 746.32  | 747.2   | 731 | 21 | 9353.66 |
| 737.58978  | 737.23  | 738.15  | 676 | 21 | 9638.14 |
| 720.62256  | 720.43  | 721.07  | 724 | 21 | 9855.81 |
| 708.63324  | 708.17  | 708.79  | 775 | 21 | 9770.2  |
| 2550.74292 | 2550.38 | 2551.28 | 49  | 20 | 475.26  |
| 1241.9469  | 1241.71 | 1242.32 | 425 | 20 | 3896.43 |
| 1076.71655 | 1076.48 | 1076.88 | 507 | 20 | 3869.28 |
| 991.35437  | 991.21  | 991.67  | 580 | 20 | 4582.2  |
| 763.54193  | 763.32  | 763.69  | 521 | 20 | 6425.7  |
| 740.57458  | 740.22  | 740.77  | 684 | 20 | 8540.1  |
| 735.58905  | 735.21  | 735.98  | 644 | 20 | 8744.47 |
| 734.59009  | 734.41  | 735.08  | 707 | 20 | 8358.14 |

**Supplementary Table S2**

Raw peptide digest mass spectroscopy data spanning a centroid mass window ranging from 1476 to 5045. All peaks with a signal:noise ratio  $\geq 20$  are included and sorted in descending order of signal:noise ratio. Peptides that represent  $\alpha$ Syn fragments are labeled.

| Centroid Mass | Lower Bound | Upper Bound | Height | S/N Ratio | Area      | Peptide                                                                                                                                   |
|---------------|-------------|-------------|--------|-----------|-----------|-------------------------------------------------------------------------------------------------------------------------------------------|
| 2156.665039   | 2143.57     | 2173.21     | 41905  | 2712.4    | 1142795.5 | K.TKEQVTNVGGAVVTGVTAVAQK.T                                                                                                                |
| 1605.908936   | 1594.48     | 1619.83     | 17854  | 720.33    | 451622.09 | K.TVEGAGSIAAATGFVKK.D                                                                                                                     |
| 1927.199097   | 1916.13     | 1942.76     | 9695   | 555.41    | 238922.78 | K.EQVTNVGGAVVTGVTAVAQK.T                                                                                                                  |
| 1523.921265   | 1518.58     | 1544.16     | 13003  | 479.42    | 354009.03 | K.EGVVHGVATVAEKT.K                                                                                                                        |
| 4862.766602   | 4826.78     | 4875.64     | 3659   | 343.69    | 104337.85 | K.DQLGKNEEGAPQEGILEDMPVDPDNEAYEMPSEEG<br>YQDYEPEA.- + 2 Oxidation (M)<br>K.NEEGAPQEGILEDMPVDPDNEAYEMPSEEGYQDYE<br>PEA.- + 2 Oxidation (M) |
| 4320.220703   | 4292.06     | 4350.65     | 2689   | 247.2     | 93012.25  |                                                                                                                                           |
| 4991.289551   | 4977.83     | 5003.92     | 2735   | 212.92    | 44780.04  |                                                                                                                                           |
| 2181.481201   | 2173.21     | 2189.21     | 4093   | 162.73    | 84704.18  |                                                                                                                                           |
| 2210.473633   | 2204.03     | 2226.12     | 3656   | 151.42    | 79721.41  |                                                                                                                                           |
| 2195.958252   | 2189.21     | 2204.03     | 3564   | 132.42    | 61218.86  |                                                                                                                                           |
| 4374.340332   | 4364.93     | 4393.2      | 1459   | 76.17     | 18747.08  |                                                                                                                                           |
| 1501.979736   | 1495.26     | 1510.17     | 2721   | 60.54     | 49865.7   |                                                                                                                                           |
| 1550.208862   | 1544.16     | 1557.86     | 2602   | 45.01     | 28389.76  |                                                                                                                                           |
| 1516.080566   | 1510.17     | 1518.58     | 2913   | 39.74     | 40604.07  |                                                                                                                                           |
| 4916.710938   | 4908.85     | 4938.09     | 1234   | 38.29     | 11850.92  |                                                                                                                                           |
| 1967.338135   | 1959.29     | 1974.95     | 1613   | 36.83     | 21413.79  |                                                                                                                                           |
| 1630.390381   | 1623.23     | 1638.56     | 2264   | 33.9      | 29549.62  |                                                                                                                                           |
| 1951.202148   | 1944.85     | 1959.29     | 1547   | 32.86     | 17968.72  |                                                                                                                                           |
| 2112.112061   | 2104.21     | 2118.99     | 1504   | 30.96     | 15730.66  |                                                                                                                                           |
| 2140.505127   | 2131.63     | 2143.57     | 1929   | 30.42     | 23242.7   |                                                                                                                                           |
| 1476.872803   | 1463.63     | 1478.19     | 1733   | 26.25     | 29845.23  |                                                                                                                                           |
| 1659.413818   | 1654.6      | 1664.69     | 2149   | 26.2      | 13615.05  |                                                                                                                                           |
| 5044.238281   | 5036.81     | 5065.68     | 1057   | 25.46     | 10205.03  |                                                                                                                                           |
| 4878.573242   | 4875.64     | 4896.66     | 1354   | 25.31     | 11535.31  |                                                                                                                                           |
| 1980.763428   | 1974.95     | 1986.92     | 1450   | 24.7      | 9468.05   |                                                                                                                                           |
| 3664.537354   | 3654.93     | 3675.36     | 746    | 24.3      | 4416.23   |                                                                                                                                           |
| 2263.260742   | 2256.32     | 2270.86     | 1832   | 23.44     | 9780.78   |                                                                                                                                           |
| 2354.366943   | 2346.35     | 2362.21     | 1498   | 23.07     | 8428.99   |                                                                                                                                           |
